# Supplementary material
Source: PubMed Central journal article supplement (PMC5615189)
Supplement: MCB.00177-17_zmb999101626s1.pdf [file MCB.00177-17_zmb999101626s1.pdf]

## Supplementary Figure S1

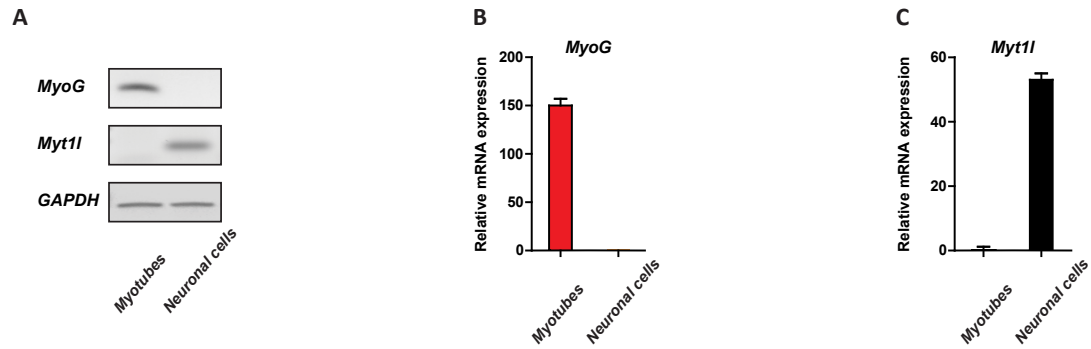

### Expression of phenotypic mRNA markers in myoblastic and neuronal cells.

(A) Conventional RT-PCR analysis to show the expression of myogenin (MyoG), Myt1L and GAPDH mRNAs in C2C12 myotubes and N2a neuronal cells, respectively. (B) MyoG and (C) Myt1L mRNA quantification by RT-qPCR analysis; relative expression was normalized to GAPDH levels.
