# Supplementary material
Source: PubMed Central journal article supplement (PMC5615189)
Supplement: MCB.00177-17_zmb999101626s3.pdf [file MCB.00177-17_zmb999101626s3.pdf]

### Supplementary Figure S3

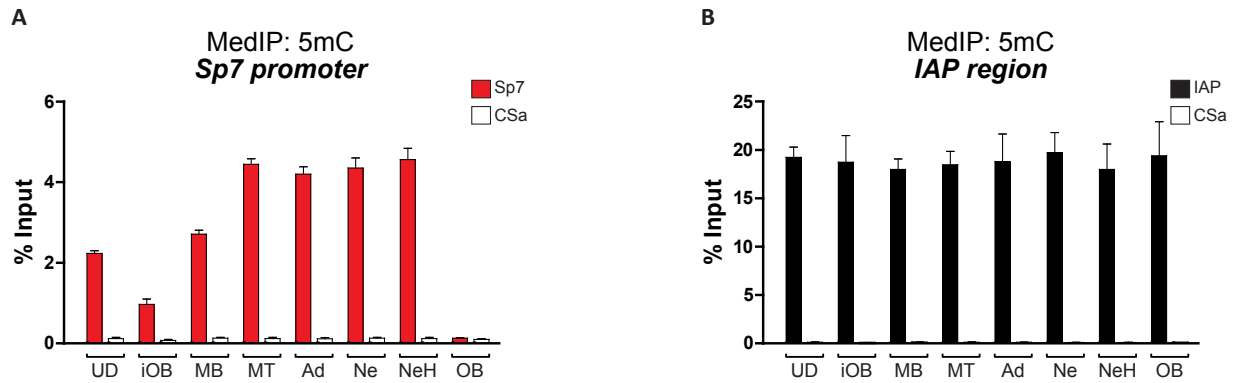

UD: Undifferentiated C3H10T1/2 cells  
iOB: C3H10T1/2 stimulated with BMP2

MB: C2C12 myoblasts  
MT: C2C12 myotubes

Ad: 3T3-L1 adipocytes  
Ne: Neuronal N2a cells

NeH: Neuron hippocampal HT-22 cells  
OB: MC3T3 osteoblasts

#### Non-osteoblastic cells exhibit DNA hypermethylated *Sp7* gene promoter.

(A) MedIP assays were performed in indicated cells types and recovered DNA was amplified using specific primers against the *Sp7* promoter. (B) The methylated IAP region was analyzed as positive control. The unmethylated region CSa was included as negative control. Enrichments were expressed as percentage of immunoprecipitation respect to input genomic DNA.
