# Supplementary material
Source: PubMed Central journal article supplement (PMC5615189)
Supplement: MCB.00177-17_zmb999101626s4.pdf [file MCB.00177-17_zmb999101626s4.pdf]

## Supplementary Table S1: Antibodies

| Antibody              | Company                                     | Code         | Application |
|-----------------------|---------------------------------------------|--------------|-------------|
| $\alpha$ -5mC         | Eurogentec                                  | BI-MECY-0100 | MedIP       |
| $\alpha$ -5hmC        | Active Motif                                | 39769        | MedIP       |
| $\alpha$ -H3          | Abcam                                       | ab1791       | ChIP; WB    |
| $\alpha$ -H3Ac        | Millipore                                   | 06-599       | ChIP; WB    |
| $\alpha$ -H3K4me1     | Abcam                                       | ab8895       | ChIP        |
| $\alpha$ -H3K4me3     | Abcam                                       | ab8580       | ChIP        |
| $\alpha$ -H3K9me3     | Abcam                                       | ab8898       | ChIP        |
| $\alpha$ -H3K27me3    | Millipore                                   | 07-449       | ChIP        |
| $\alpha$ -HDAC1       | Abcam                                       | ab7028       | ChIP        |
| $\alpha$ -HDAC2       | Abcam                                       | ab7029       | ChIP        |
| $\alpha$ -HDAC4       | Santa Cruz                                  | SC-11418     | ChIP        |
| $\alpha$ -SETDB1/ESET | Santa Cruz                                  | SC-66884     | ChIP        |
| $\alpha$ -SUV39H1     | Abcam                                       | ab12405      | ChIP        |
| $\alpha$ -Jmj2a       | Santa Cruz                                  | SC-135065    | ChIP; WB    |
| $\alpha$ -Jmj3        | Abcam                                       | ab38113      | ChIP; WB    |
| $\alpha$ -Utx         | Santa Cruz                                  | SC-79334     | ChIP        |
| $\alpha$ -Wdr5        | Abcam                                       | ab56919      | ChIP        |
| $\alpha$ -Cgbp        | Santa Cruz                                  | SC-25391     | ChIP        |
| $\alpha$ -Set1B       | Santa Cruz                                  | SC-248563    | ChIP        |
| $\alpha$ -Mll2        | Santa Cruz                                  | SC-292359    | ChIP        |
| $\alpha$ -Mll4        | Abcam                                       | ab60053      | ChIP        |
| $\alpha$ -Tet1        | Abcam                                       | ab157004     | ChIP; WB    |
| $\alpha$ -Tet2        | Santa Cruz                                  | SC-136926    | ChIP; WB    |
| $\alpha$ -Dnmt1       | Santa Cruz                                  | SC-20701     | ChIP        |
| $\alpha$ -Dnmt3a      | Abcam                                       | ab2850       | ChIP        |
| $\alpha$ -RNAPol II   | Covance                                     | 8WG16/MSR6R  | ChIP        |
| $\alpha$ -RNAPol II   | Santa Cruz                                  | SC-899       | WB          |
| $\alpha$ -FLAG        | Sigma                                       | F3165        | ChIP; WB    |
| $\alpha$ -Brm         | Santa Cruz                                  | SC-6449      | WB          |
| $\alpha$ -Brm         | both sera were kindly <i>donated by Dr.</i> |              | ChIP        |
| $\alpha$ -Brg1        | Anthony <i>Imbalzano</i> (UMASS, MA, USA)   |              | ChIP        |
