# Supplementary material
Source: PubMed Central journal article supplement (PMC5615189)
Supplement: MCB.00177-17_zmb999101626s5.pdf [file MCB.00177-17_zmb999101626s5.pdf]

**Supplementary Table S2:**  
Primer sequences (5'-3')

| <b>RT-qPCR</b>       |                       |                        |
|----------------------|-----------------------|------------------------|
| Gene                 | Forward (5'-3')       | Reverse (5'-3')        |
| <i>Sp7 (mouse)</i>   | AACCTGGAGGCGAGTTAGCA  | CTGCCTCAGCACAAACAGACC  |
| <i>Sp7 (rat)</i>     | AGGAGGGTAGGAAGGGTGGT  | GAAACACAATGGGGCTGGT    |
| <i>Runx2 (rat)</i>   | CCAGCTCATTATTGTAGTATT | GCTACGAATCTCTAATCTTAA  |
| <i>Bglap (rat)</i>   | TAAGAGATCAGCAGGTATTAT | CCGCTGTCTGTGCCAGGATA   |
| <i>Ric8B (rat)</i>   | CGGACTGTACAGCTCATTAAA | GCCGACAACAATGAGAACCCTT |
| <i>GAPDH (mouse)</i> | CGAACCTGTTAATAAGATCAA | GCAAGATGAAACTCGGTGATT  |
| <i>GAPDH (rat)</i>   | GCGGACTGTACAGCTCATTAA | CGGACTGTACAGCTCATTAAA  |
| <i>Tet1 (mouse)</i>  | CGTTCTCTTTGGAAAGGTGTT | GCCAACCTGTACTATGTTTAA  |
| <i>Tet2 (mouse)</i>  | GCAAGCTACTTCCATGGGTTA | CGAACCTGTTAATAAGATCAA  |
| <i>Tet3 (mouse)</i>  | GCAAGATGAAACTCGGTGATT | GCGGACTGTACAGCTCATTAA  |
| <i>MyoG (mouse)</i>  | CCTACAGCAGATCACTCACAT | CGTTCTCTTTGGAAAGGTGTT  |
| <i>Myt1L (mouse)</i> | GCCAGTGATTTGGAGGTGAAT | CCAGTGGTTGAAGACTAGCAA  |

| <b>ChIP</b>             |                       |                       |
|-------------------------|-----------------------|-----------------------|
| Region                  | Forward (5'-3')       | Reverse (5'-3')       |
| <i>Sp7 (mouse)</i>      | CCCATCGTGTACTACCACG   | GCGCGAGCGCAACAACATC   |
| <i>Sp7 (rat)</i>        | GCTCCAATACTGTTGGCACTA | CCACCAACAATGCTTCATCTT |
| <i>Bglap -5Kb (rat)</i> | TCCAAGGAGTATAAGCAGAGG | GGTGCTCGGATCCCAAAGAA  |

| <b>MedIP</b>       |                      |                      |
|--------------------|----------------------|----------------------|
| Region             | Forward (5'-3')      | Reverse (5'-3')      |
| <i>Sp7 (mouse)</i> | TTAGCTGGCTTAAGGATGCG | GTGAAGACCGTTATGGTCAA |
| <i>IAP (mouse)</i> | TTGGGACAGTCCAAGTCTT  | CCCTTCACCACCTTCTTGAT |
| <i>CSa (mouse)</i> | ACATATCCAAGGACGTGTAA | AGCTAACTCCAACCTTCCAG |

| <b>DNA methylation analyses using restriction endonucleases</b> |                       |                       |
|-----------------------------------------------------------------|-----------------------|-----------------------|
| Region                                                          | Forward (5'-3')       | Reverse (5'-3')       |
| <i>Sp7 (mouse)</i>                                              | TGGACAATGCTCAGGGGTCCC | GTAGACGTGATCCGATCCACA |
| <i>Sp7 (human)</i>                                              | CGACACAGCCGCACTCTTCC  | TGCTTGAACAAGTTCGGCAG  |
| <i>Ric8B (mouse)</i>                                            | GCACCTTCTCTGCACAAGG   | ACAACCCCTTCAGCTCCTT   |
| <i>Ric8B (human)</i>                                            | CAAGAAGCAGACAATAATCA  | CGTATGCTATGATCAGGTTCT |
| <i>Runx2 (mouse)</i>                                            | CTGTCCACGCTGATGAAAGA  | AGAGGGAGCCAGCTTTGAA   |
